# Supplementary material
Source: PubMed Central journal article supplement (PMC3869466)
Supplement: NIHMS536984-supplement-1_si_001.pdf [file NIHMS536984-supplement-1_si_001.pdf]

# Arginine Modifications by Methylglyoxal: Discovery in a Recombinant Monoclonal Antibody and Contribution to Acidic Species

Chris Chumsae <sup>1,□,\*</sup>, Kathreen Gifford <sup>1</sup>, Wei Lian <sup>2</sup>, Hongcheng Liu <sup>1</sup>, Czeslaw H. Radziejewski<sup>1</sup> and Zhaohui Sunny Zhou <sup>3\*</sup>

1, Protein Analytics, Process Sciences Department, 2, Cell Culture, Manufacturing Sciences Department, AbbVie Bioresearch Center, Worcester, Massachusetts 01605, USA

3, Barnett Institute of Chemical and Biological Analysis, Department of Chemistry and Chemical Biology, Northeastern University, Boston, Massachusetts 02115, USA;

## SUPPORTING INFORMATION

### Table of Contents

|                   |                                                                                                                         |            |
|-------------------|-------------------------------------------------------------------------------------------------------------------------|------------|
| <b>Figure S-1</b> | Comparison of peptide MS data between acidic peaks from cell culture and acidic fractions from methylglyoxal incubation | <b>S-3</b> |
| <b>Figure S-2</b> | Comparison of peptide MS/MS data between acidic peaks from cell culture and acidic peaks from methylglyoxal incubation  | <b>S-4</b> |
| <b>Figure S-3</b> | Reduced analysis of light chain from peaks 1 and 2 formed during cell culture                                           | <b>S-5</b> |
| <b>Figure S-4</b> | Reduced analysis of heavy chain from peaks 1 and 2 formed during cell culture                                           | <b>S-6</b> |
| <b>Figure S-5</b> | Formation of Peak 1 and Peak 2 during cell culture                                                                      | <b>S-8</b> |

|                    |                                                                                                             |             |
|--------------------|-------------------------------------------------------------------------------------------------------------|-------------|
| <b>Figure S-6</b>  | Quantification of MGO-modified sites using Lys-C peptide maps                                               | <b>S-9</b>  |
| <b>Figure S-7</b>  | Mass spectrum of a heavy chain Lys-C peptide                                                                | <b>S-10</b> |
| <b>Figure S-8</b>  | Light chain mass spectra from MGO timecourse                                                                | <b>S-11</b> |
| <b>Figure S-9</b>  | Heavy chain mass spectra from MGO timecourse                                                                | <b>S-12</b> |
| <b>Table S-1</b>   | Results of manual search of methylglyoxal modified peptides found in the recombinant antibody               | <b>S-13</b> |
| <b>Table S-2</b>   | Results of Sequest algorithm search against the primary structure                                           | <b>S-14</b> |
| <b>Figure S-10</b> | Calculated pKa of the core group of arginine and the two products of arginine modification by methylglyoxal | <b>S-16</b> |
| <b>Table S-3</b>   | Raw data values of Lys-C peptide peak intensity from Cell Culture WCX fractions 1 and 2                     | <b>S-17</b> |
| <b>Table S-4</b>   | Relative Intensity of Lys-C peptides from Cell Culture WCX fractions 1 and 2                                | <b>S-17</b> |
| <b>Figure S-11</b> | Detection limit of reduced LC/MS to detect MGO (+54 Da)                                                     | <b>S-18</b> |

# ASQGIR(MGO)NYLAQYQQKPGK

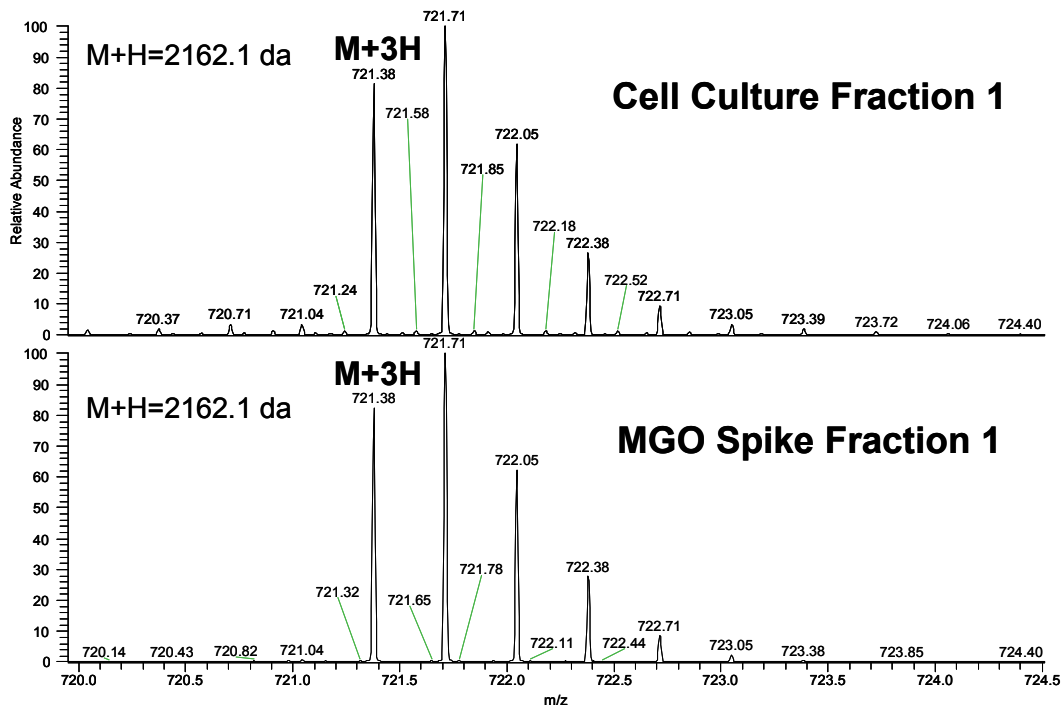

Figure S-1.: Comparison of peptide MS data between acidic peaks from cell culture and acidic fractions from methylglyoxal incubation. The data shows the corresponding mass spectra of a 3+ ion representing a mis-cleaved peptide with a mass increase of 54 daltons.

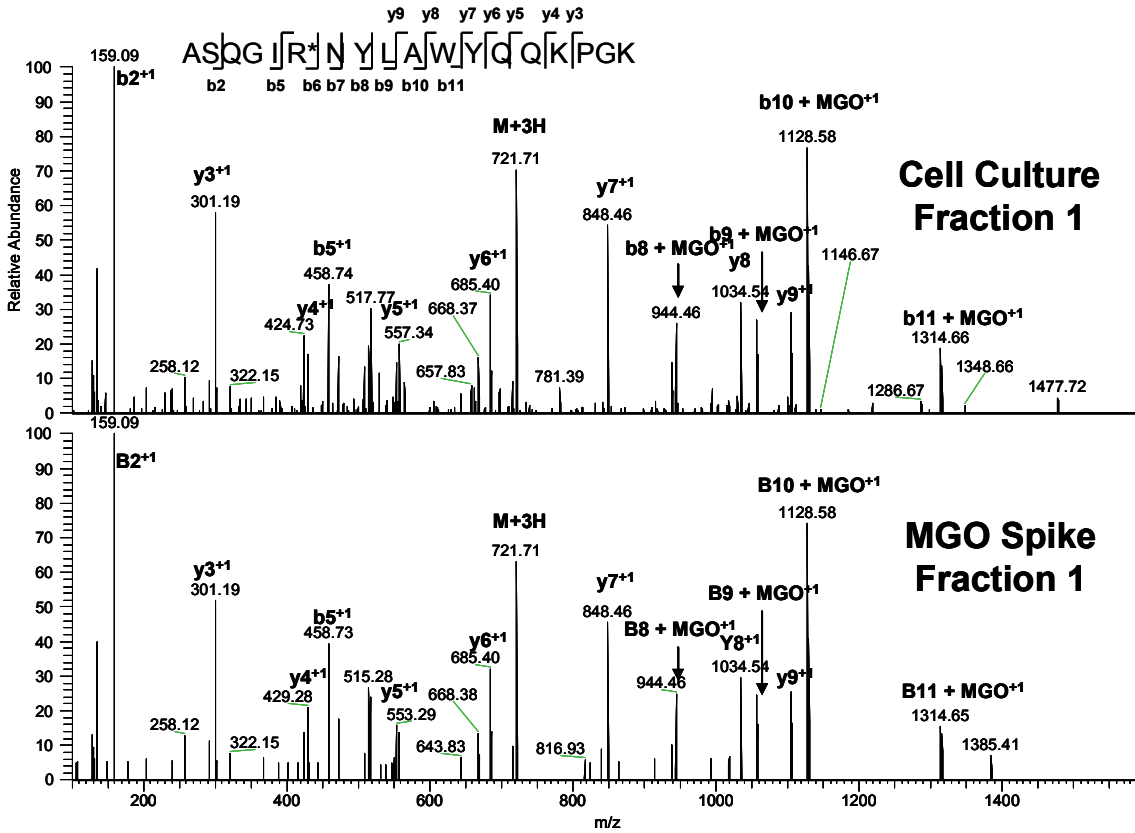

Figure S-2.: Comparison of peptide MS/MS data of the 3+ parent ion between acidic peaks from cell culture and acidic peaks from methylglyoxal incubation. The figure shows the MS/MS spectra of the two peptides from the Cell Culture fraction and from the MGO spike fractions, respectively and confirms that the observed mass shift of +54 Da resides on the mis-cleaved arginine residue.

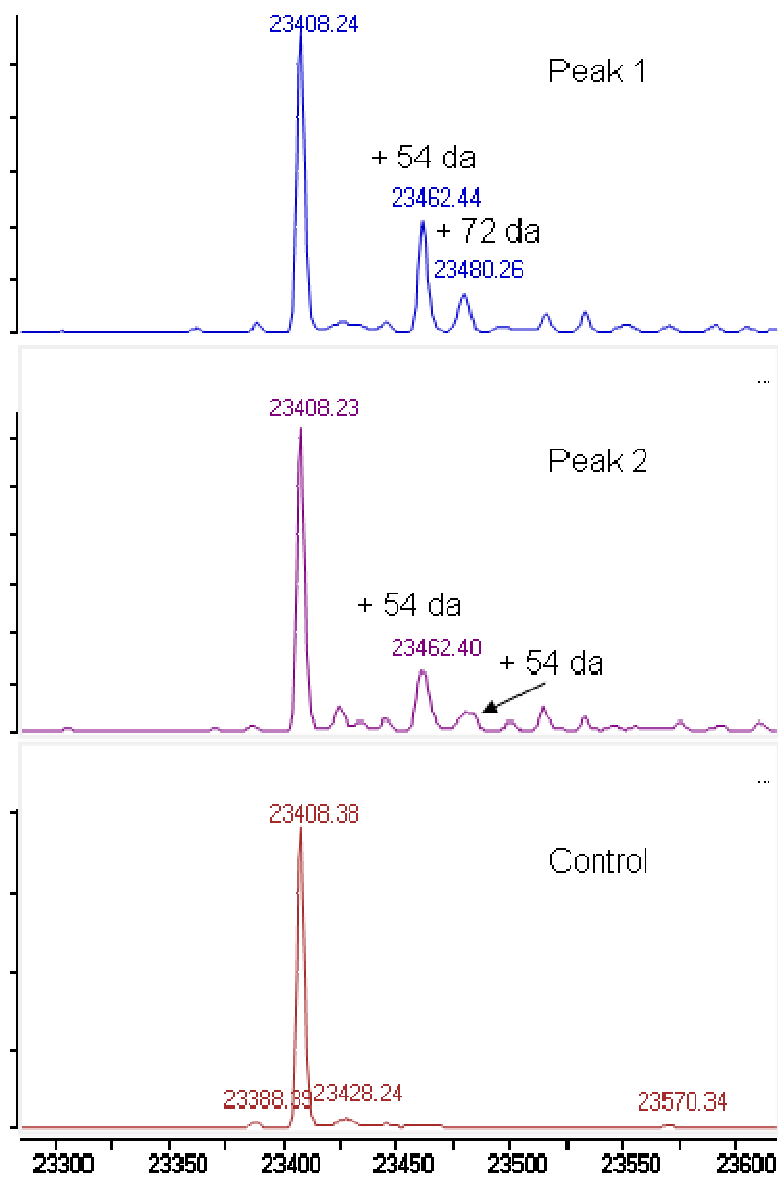

Figure S-3.: Reduced analysis of light chain from peaks 1 and 2 formed during cell culture. In all three panes, the observed mass of 23408.38 da (Control) can be seen which is in good agreement with the theoretical mass of 23408.13 da. In addition to the light chain mass, additional peaks can be seen in the spectra of fraction 1 and fraction 2 which correspond to mass increases of 54 and 72 da greater than the expected mass.

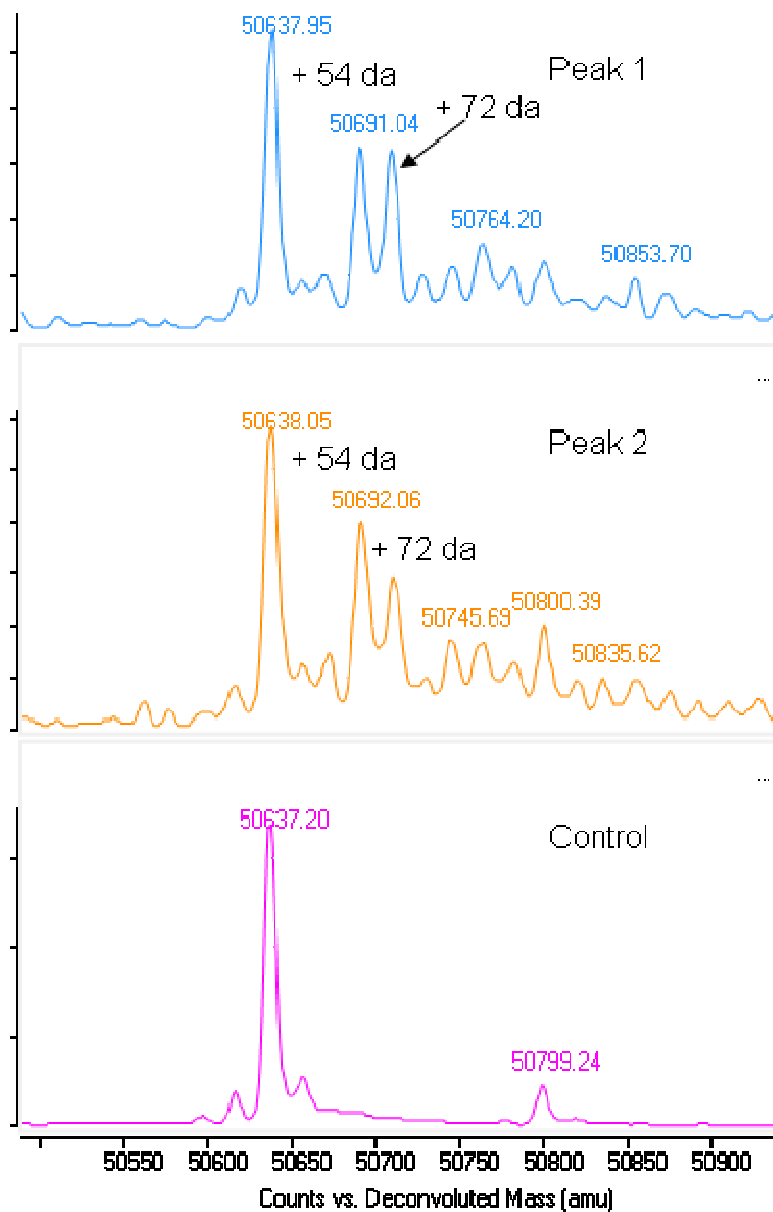

Figure S-4.: Reduced analysis of heavy chain from peaks 1 and 2 formed during cell culture. The heavy chain mass of 50637.20 (Control) can be seen in all three panes of the figure which is in good agreement to the theoretical mass of 50636.78 da (0 gal, 0 Lysine heavy chain). In addition to the heavy chain mass, other peaks are observed in the spectra which correspond to mass increases of +54 da and +72 da over the heavy chain

mass. Multiple lower intensity peaks of greater mass are likely the same MGO modification which has occurred at multiple sites.

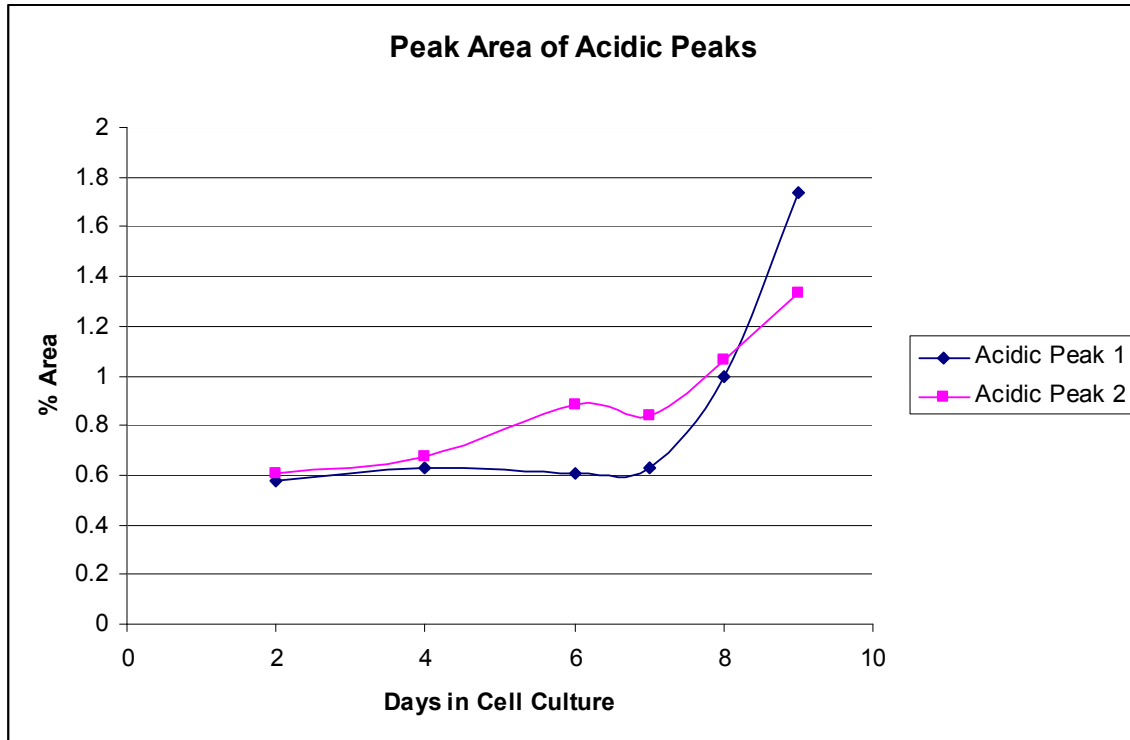

Figure S-5.: The figure shows the relative integrated area of the two acidic peaks analyzed by weak cation exchange chromatography over the duration of the cell culture. The peaks begin to increase at later days in the harvest. Peak 2 increases at day 6 where as peak 1 increases at day 8 of the cell culture. The increase in peak area is presumably due to the antibody becoming modified by methylglyoxal.



RT: 34.81 - 58.08

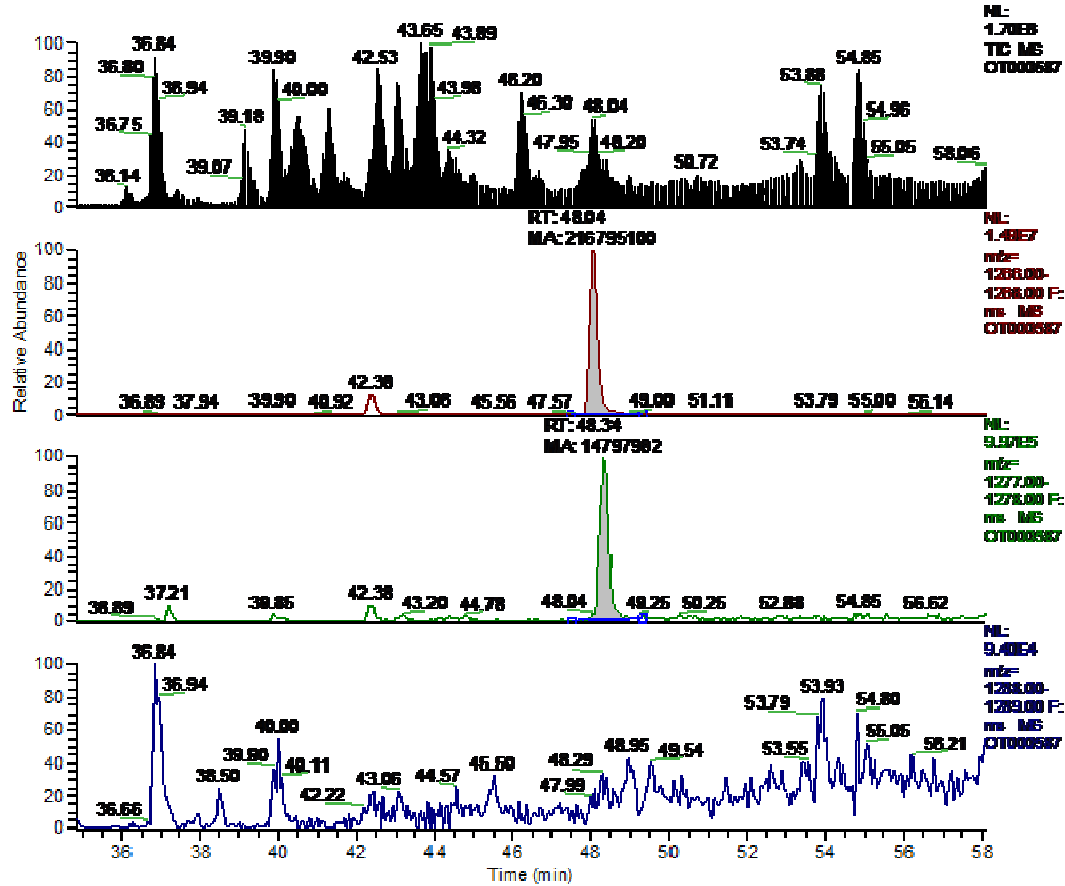

Figure S-6 : The figure shows the total ion current (top), the native peptide (second pane), the peptide modified by one MGO (+54 da) and lastly, a trace showing no evidence of the second arginine within this peptide being modified. The site was identified by previous tryptic digest and the degree of modification was determined by the percent of the respective peaks in the XIC's of the native and MGO modified peptides

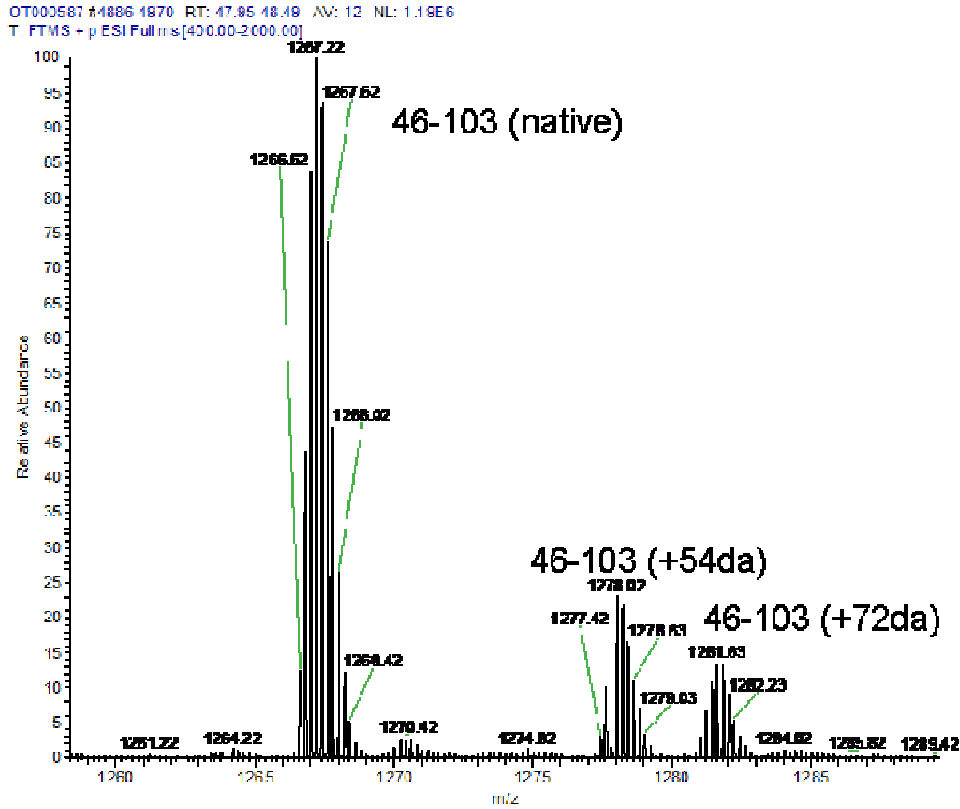

Figure S-7.: The figure displays a mass spectrum of a heavy chain Lys-C peptide showing the isotopic distributions of the +5 charge state (Arg93 internalized). In this manner, the native and the two MGO products of a single modified arginine can be seen within the same spectrum.

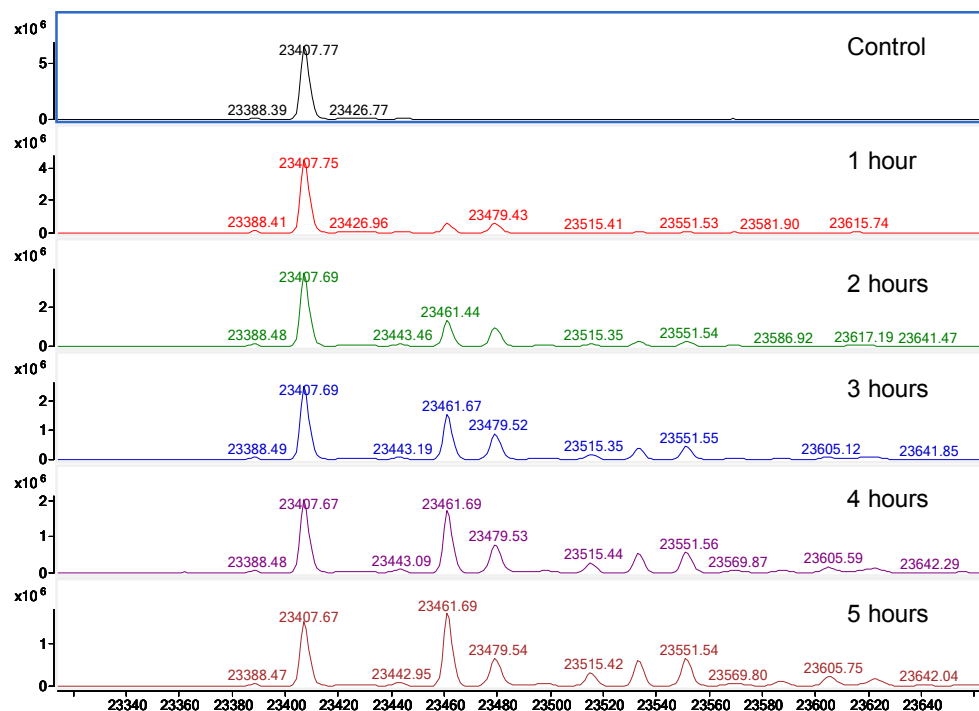

Figure S-8.: Mass spectra of the light chain for a pure 0 Lys are shown over the five hour period. The additional peaks of +54da and +72da have formed and have greatly increased the observed mass heterogeneity. The formation of the additional peaks is in agreement with the observed peaks from the acidic fractions isolated from cell culture. The control was incubated for the entire five hour period but without the addition of methylglyoxal and subsequently showed no added complexity or formation of additional peaks.

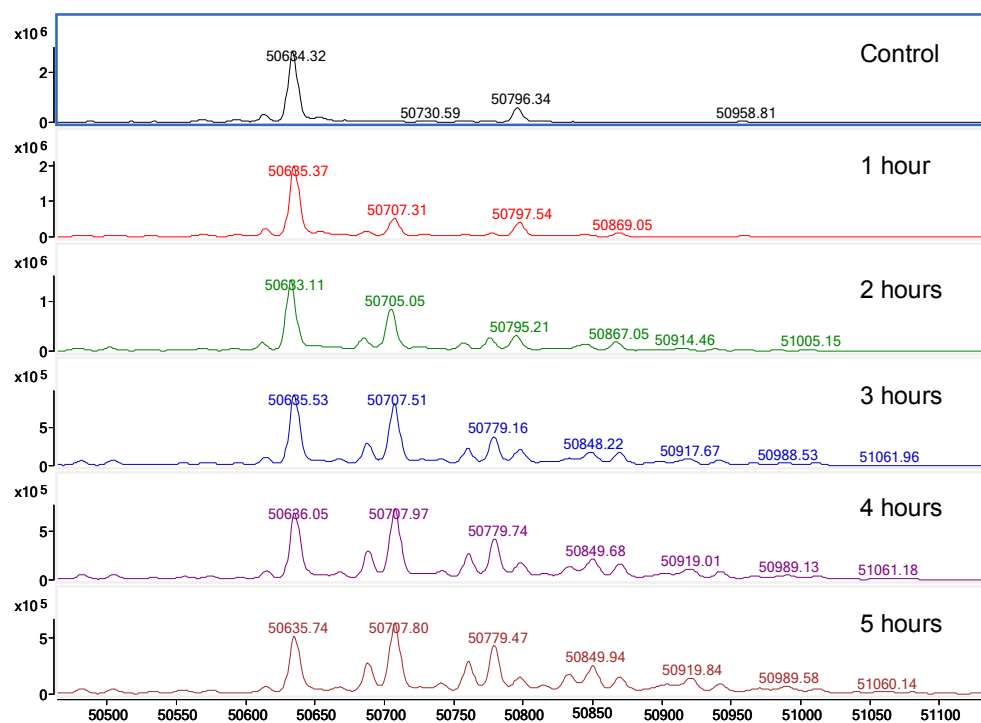

Figure S-9.: Mass spectra of the heavy chain for a pure 0 Lys are shown over the five hour period. The additional peaks of +54da and +72da have formed and have greatly increased the observed mass heterogeneity.

Table S-1.: Results of manual search of methylglyoxal modified peptides found in the recombinant antibody

**MGO Modified Tryptic Peptides (mis-cleavages)**

ASQGIR\*NYLAWYQQKPGK

YNR\*APYTFGQGTK

R\*TVAAPSVFIFPPSDEQLK

EVQLVESGGGLVQPGR\*SLR

DTLMISR\*TPEVTCVVVDVSHEDPEVK

EPQVYTLPPSR\*DELTk

SR\*WQQGNVFSCSVMHEALHNHYTQK

Table S-2.: Results of Sequest algorithm search against the theoretical sequence

| Sequence               | Activation Type | Modifications                        | Charge | m/z [Da] | MH+ [Da] | RT [min] | MS Order |
|------------------------|-----------------|--------------------------------------|--------|----------|----------|----------|----------|
| EPQVYTLPPSrDELTK       | HCD             | R11(MGO (R) 72)                      | 2      | 972.9988 | 1944.99  | 27.71    | MS2      |
| EPQVYTLPPSrDELTK       | CID             | R11(MGO (R) 72)                      | 3      | 649.0014 | 1944.99  | 27.72    | MS2      |
| EPQVYTLPPSrDELTK       | CID             | R11(MGO)                             | 3      | 642.9988 | 1926.982 | 27.81    | MS2      |
| EPQVYTLPPSrDELTK       | HCD             | R11(MGO)                             | 3      | 642.9988 | 1926.982 | 27.82    | MS2      |
| EPQVYTLPPSrDELTK       | CID             | R11(MGO)                             | 2      | 963.9942 | 1926.981 | 27.88    | MS2      |
| EPQVYTLPPSrDELTK       | HCD             | R11(MGO)                             | 2      | 963.9942 | 1926.981 | 27.89    | MS2      |
| EVQLVESGGGLVQPGrSLR    | CID             | R16(MGO (R) 72)                      | 2      | 1027.055 | 2053.103 | 32       | MS2      |
| EVQLVESGGGLVQPGrSLR    | HCD             | R16(MGO (R) 72)                      | 2      | 1027.055 | 2053.103 | 32.01    | MS2      |
| EVQLVESGGGLVQPGrSLR    | CID             | R16(MGO)                             | 3      | 679.0353 | 2035.091 | 32.11    | MS2      |
| EVQLVESGGGLVQPGrSLR    | CID             | R16(MGO)                             | 2      | 1018.05  | 2035.092 | 32.13    | MS2      |
| EVQLVESGGGLVQPGrSLR    | HCD             | R16(MGO)                             | 2      | 1018.05  | 2035.092 | 32.15    | MS2      |
| YNrAPYTFGQGTK          | CID             | R3(MGO (R) 72)                       | 2      | 787.8835 | 1574.76  | 17.61    | MS2      |
| YNrAPYTFGQGTK          | HCD             | R3(MGO (R) 72)                       | 2      | 787.8835 | 1574.76  | 17.62    | MS2      |
| YNrAPYTFGQGTK          | CID             | R3(MGO (R) 72)                       | 3      | 525.5911 | 1574.759 | 17.63    | MS2      |
| YNrAPYTFGQGTK          | HCD             | R3(MGO (R) 72)                       | 3      | 525.5911 | 1574.759 | 17.64    | MS2      |
| YNrAPYTFGQGTKVEIK      | CID             | R3(MGO (R) 72)                       | 2      | 1022.461 | 2043.916 | 46.16    | MS2      |
| SLrLScAASGFTFDDYAMHWVR | CID             | R3(MGO (R) 72),<br>C6(Carboxymethyl) | 3      | 888.4062 | 2663.204 | 49.36    | MS2      |
| SLrLScAASGFTFDDYAMHWVR | HCD             | R3(MGO (R) 72),<br>C6(Carboxymethyl) | 3      | 888.4062 | 2663.204 | 49.38    | MS2      |
| YNrAPYTFGQGTK          | CID             | R3(MGO)                              | 2      | 778.8782 | 1556.749 | 17.49    | MS2      |
| YNrAPYTFGQGTK          | HCD             | R3(MGO)                              | 2      | 778.8782 | 1556.749 | 17.5     | MS2      |
| YNrAPYTFGQGTK          | CID             | R3(MGO)                              | 3      | 519.5878 | 1556.749 | 17.56    | MS2      |
| YNrAPYTFGQGTK          | HCD             | R3(MGO)                              | 3      | 519.5878 | 1556.749 | 17.57    | MS2      |
| ASQGIrNYLAWYQQKPGK     | CID             | R6(MGO (R) 72)                       | 3      | 727.3791 | 2180.123 | 32.15    | MS2      |
| ASQGIrNYLAWYQQKPGK     | HCD             | R6(MGO (R) 72)                       | 3      | 727.3791 | 2180.123 | 32.16    | MS2      |
| ASQGIrNYLAWYQQKPGK     | CID             | R6(MGO (R) 72)                       | 2      | 1090.566 | 2180.125 | 32.2     | MS2      |

|                                |     |                                       |   |          |          |       |     |
|--------------------------------|-----|---------------------------------------|---|----------|----------|-------|-----|
| ASQGIrNYLAWYQQKPGK             | HCD | R6(MGO (R) 72)                        | 2 | 1090.566 | 2180.125 | 32.21 | MS2 |
| ASQGIrNYLAWYQQKPGK             | CID | R6(MGO)                               | 3 | 721.3756 | 2162.112 | 31.52 | MS2 |
| ASQGIrNYLAWYQQKPGK             | HCD | R6(MGO)                               | 3 | 721.3756 | 2162.112 | 31.53 | MS2 |
| ASQGIrNYLAWYQQKPGK             | CID | R6(MGO)                               | 2 | 1081.561 | 2162.115 | 31.55 | MS2 |
| ASQGIrNYLAWYQQKPGK             | HCD | R6(MGO)                               | 2 | 1081.561 | 2162.115 | 31.56 | MS2 |
| DTLMISrTPEVTcVVVDVSHEDPE<br>VK | CID | R7(MGO (R) 72),<br>C13(Carboxymethyl) | 3 | 1010.155 | 3028.451 | 44.42 | MS2 |
| DTLMISrTPEVTcVVVDVSHEDPE<br>VK | HCD | R7(MGO (R) 72),<br>C13(Carboxymethyl) | 3 | 1010.155 | 3028.451 | 44.43 | MS2 |
| DTLMISrTPEVTcVVVDVSHEDPE<br>VK | CID | R7(MGO),<br>C13(Carboxymethyl)        | 3 | 1004.152 | 3010.442 | 44.14 | MS2 |
| DTLMISrTPEVTcVVVDVSHEDPE<br>VK | HCD | R7(MGO),<br>C13(Carboxymethyl)        | 3 | 1004.152 | 3010.442 | 44.15 | MS2 |

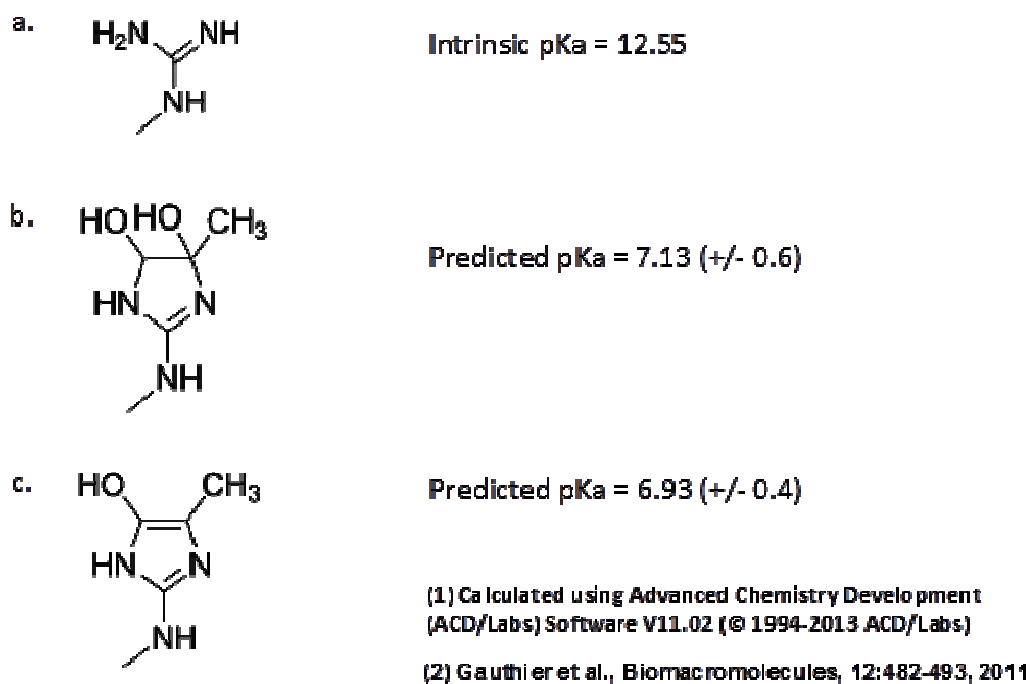

Figure S-10.: Calculated pKa of the core group of arginine and the two products of arginine modification by methylglyoxal. The pKa of the guanidinium core group is significantly depressed to 7.13 and 6.93 for the dihydroxyimidazolidine and hydroimidazolone core groups, respectively



Table S-3: Raw data values of Lys-C peptide peak intensity from Cell Culture WCX fractions 1 and 2

| Site         | Fraction 1 Peak Intensities |           |           | Fraction 2 Peak Intensities |            |           |
|--------------|-----------------------------|-----------|-----------|-----------------------------|------------|-----------|
|              | Unmod.                      | MGO(+54)  | MGO(+72)  | Unmod.                      | MGO(+54)   | MGO(+72)  |
| <b>LC30</b>  | 273429695                   | 138486086 | 27697217  | 398154884                   | 86277387.5 | 19843799  |
| <b>LC93</b>  | 637430527                   | 54150819  | 10830164  | 517745203                   | 52710066.9 | 12123315  |
| <b>LC108</b> | 567693294                   | 2761976.3 | 552395.27 | 293643660                   | 980063.272 | 225414.55 |
| <b>HC16</b>  | 517056804                   | 73797731  | 14759546  | 672482015                   | 90574849.9 | 20832215  |
| <b>HC259</b> | 478982501                   | 47025077  | 9405015.5 | 614438486                   | 64274080   | 14783038  |
| <b>HC359</b> | 321068113                   | 41433990  | 8286798.1 | 451460954                   | 53981224.7 | 12415682  |
| <b>HC420</b> | 359124190                   | 14302232  | 2860446.4 | 416919964                   | 15076683   | 3467637.1 |

Table S-4: Relative Intensity of Lys-C peptides from Cell Culture WCX fractions 1 and 2

| Site         | Fraction 1 Peak Intensities |             |             | Fraction 2 Peak Intensities |             |            |
|--------------|-----------------------------|-------------|-------------|-----------------------------|-------------|------------|
|              | Unmod                       | MGO (+54)   | MGO (+54)   | Unmod                       | MGO (+72)   | MGO (+72)  |
| <b>LC30</b>  | 1.00                        | 0.506477855 | 0.216693028 | 1.00                        | 0.101295571 | 0.0498394  |
| <b>LC93</b>  | 1.00                        | 0.08495172  | 0.101806963 | 1.00                        | 0.016990344 | 0.0234156  |
| <b>LC108</b> | 1.00                        | 0.004865262 | 0.003337594 | 1.00                        | 0.000973052 | 0.00076765 |
| <b>HC16</b>  | 1.00                        | 0.142726546 | 0.134687394 | 1.00                        | 0.028545309 | 0.0309781  |
| <b>HC259</b> | 1.00                        | 0.098177026 | 0.104606208 | 1.00                        | 0.019635405 | 0.02405943 |
| <b>HC359</b> | 1.00                        | 0.129050469 | 0.119570085 | 1.00                        | 0.025810094 | 0.02750112 |
| <b>HC420</b> | 1.00                        | 0.039825309 | 0.036162056 | 1.00                        | 0.007965062 | 0.00831727 |

### A. Reduced Light Chain

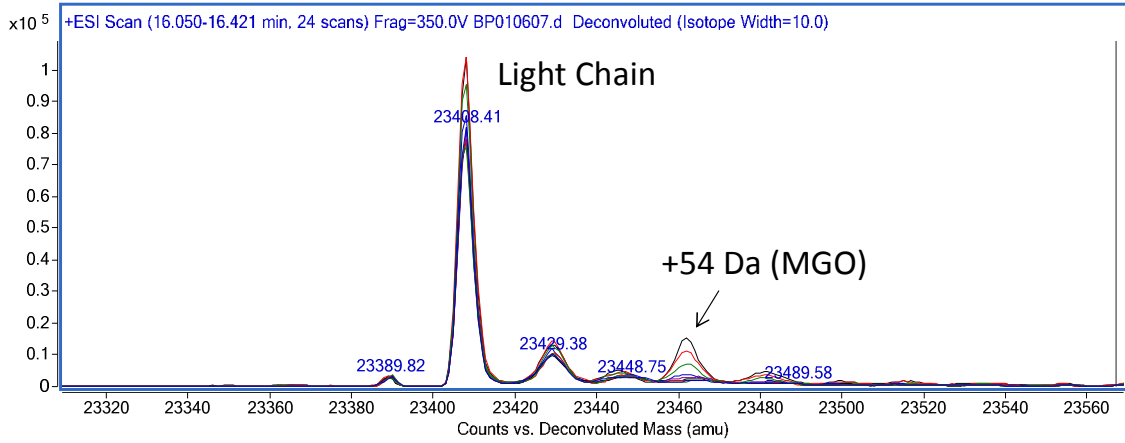

### B. Expanded view of the +54 Da modified light chain

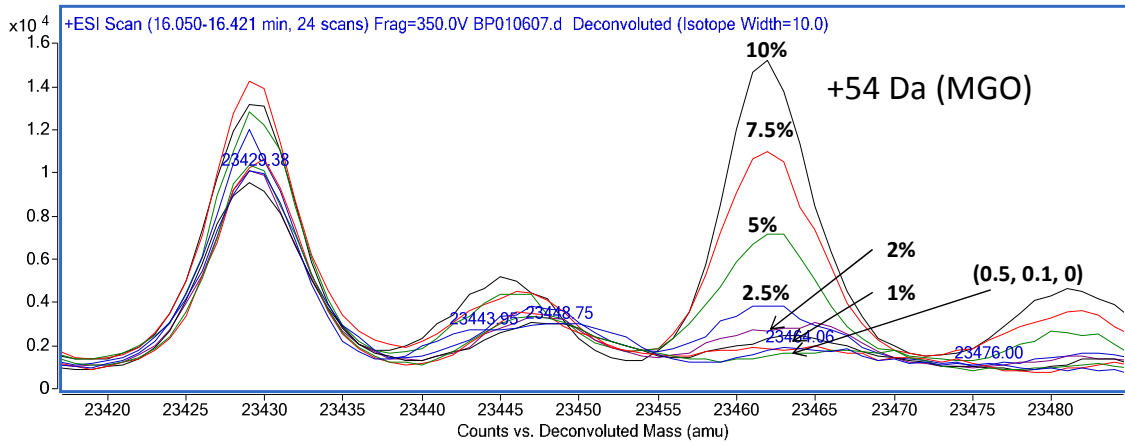

Figure S-11: Detection limit of reduced LC/MS to detect MGO (+54 Da) . The deconvoluted mass spectrum of reduced light chain spiked with MGO modified light chain (top pane is full view and bottom pane focuses on the +54 Da species). Modified light chain was spiked into native light chain to deduce the level at which the +54 Da peak could be detected without an enrichment step. The data shows overlaid traces at 10%, 7.5%, 5%, 2.5%, 2%, 1%, 0.5%, 0.1% and 0% modified antibody spikes. The +54 Da peak was detected at 2% modification and was unambiguously identified at 5% modification on our instrument.
